# Supplementary material
Source: publisher figshare collection journal article supplement (https://karger.figshare.com/articles/dataset/_/5129611)

**Supplementary Figure 1. Monthly variations in MPR in patients treated with etanercept, adalimumab and ustekinumab.** Dots represent MPR of individual patients, the red curve shows the trend.

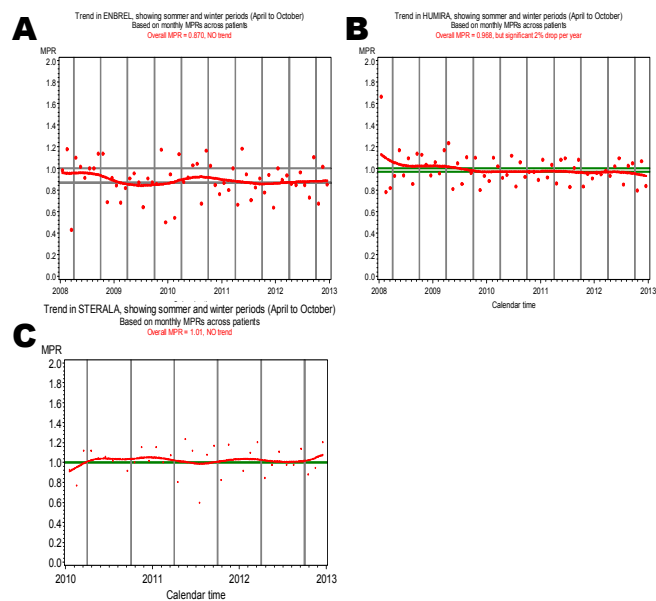

Supplement: Supplementary file 1 [file 1]
