# Supplementary material
Source: publisher figshare collection journal article supplement (https://karger.figshare.com/articles/dataset/_/5129611)
Supplement: Supplementary file 2 [file 1 › 000444581_sm_Patients and Methods.docx]

**Patients and Methods**

*Patient Recruitment and Data Extraction*

All biologic drugs are dispensed to the patients directly from our Department and recorded in individual patient charts, including the identity of the patient, the date, and the amount of the drug dispensed. These charts were the source of information used for the calculation of MPR. Out of 954 patients who were treated with biologics at the time of the study, 355 patients fulfilled the inclusion criteria: (1) diagnosis of plaque psoriasis with or without psoriasis arthritis and (2) treatment with a biologic drug (adalimumab, etanercept, or ustekinumab) in an outpatient setting for at least 12 months. Of those, complete information required for MPR calculation was available for 247 patients (table 1). Additional clinical data (PASI, DLQI, presence of psoriatic arthritis, concomitant treatment, and cause for treatment discontinuation) were obtained from the national database DERMBIO [10, 11].

*Measurement of Patients’ Beliefs and Attitudes*

Six questions (Q1--Q5 and Q8) were derived from a validated MARS [17] (questions are shown in fig. 3). We added two questions (Q6 and Q7) to evaluate the quality of hospital care and beliefs toward medication. The responses were provided on a 5-point ordinal scale of the degree of agreement (‘strongly disagree -- disagree -- undecided -- agree -- strongly agree’). The items were translated from English to Danish and then translated back into English again by two different professional translators. The questionnaire was sent to all 355 eligible patients, and we obtained a response rate of 71% (n = 252). To avoid recall bias, the responses went through a further selection process, retaining only those from the patients who were on active treatment and completed the questionnaire during the time of the study, and whose MPR data were available (n = 161 patients: etanercept, n = 24; adalimumab, n = 74; ustekinumab, n = 63). To simplify the analysis of the data, we calculated the total score from questions Q1--Q8 by giving numeric values to the answers. For questions Q1 and Q5--Q8 the values were as follows: strongly disagree = 0, disagree = 1, undecided = 2, agree = 3, and strongly agree = 4. For questions Q2--Q4 the sequence was reversed, assigning a value of 4 to ‘strongly disagree’ and 0 to ‘strongly agree’.

*Data Analysis*

Data were manually transferred to a Microsoft Excel spreadsheet and exported to the SPSS statistical package (version 22; IBM, Armonk, N.Y., USA). MPR was calculated on a monthly basis by dividing the actual use of medication by the stipulated use. One overall MPR value was calculated per patient by taking the average of all the monthly MPR values. Adherence of patients was considered medium if the MPR ranged from 0.50 to 0.79 and low if their MPR was less than 0.50. These cutoff values are considered in adherence research, and several studies in the past have used these values to categorize adherence [18]. p ≤ 0.05 was considered significant.
